# Supplementary material for: Effects of Insect-Resistant Maize HGK60 on Community Diversity of Bacteria and Fungi in Rhizosphere Soil
Source: MDPI journal article supplement (doi:10.3390/plants11212824), 2022-10-24

## Abundance

- HS.A
- HA.B
- MS.A
- MS.B
- DS.A
- DS.B
- PH.A
- PH.B

## Phylum

- Ascomycota
- Mortierellomycota
- Chytridiomycota
- Basidiomycota
- Rozellomycota
- Mucoromycota
- Glomeromycota
- Zoopagomycota
- Kickxellomycota

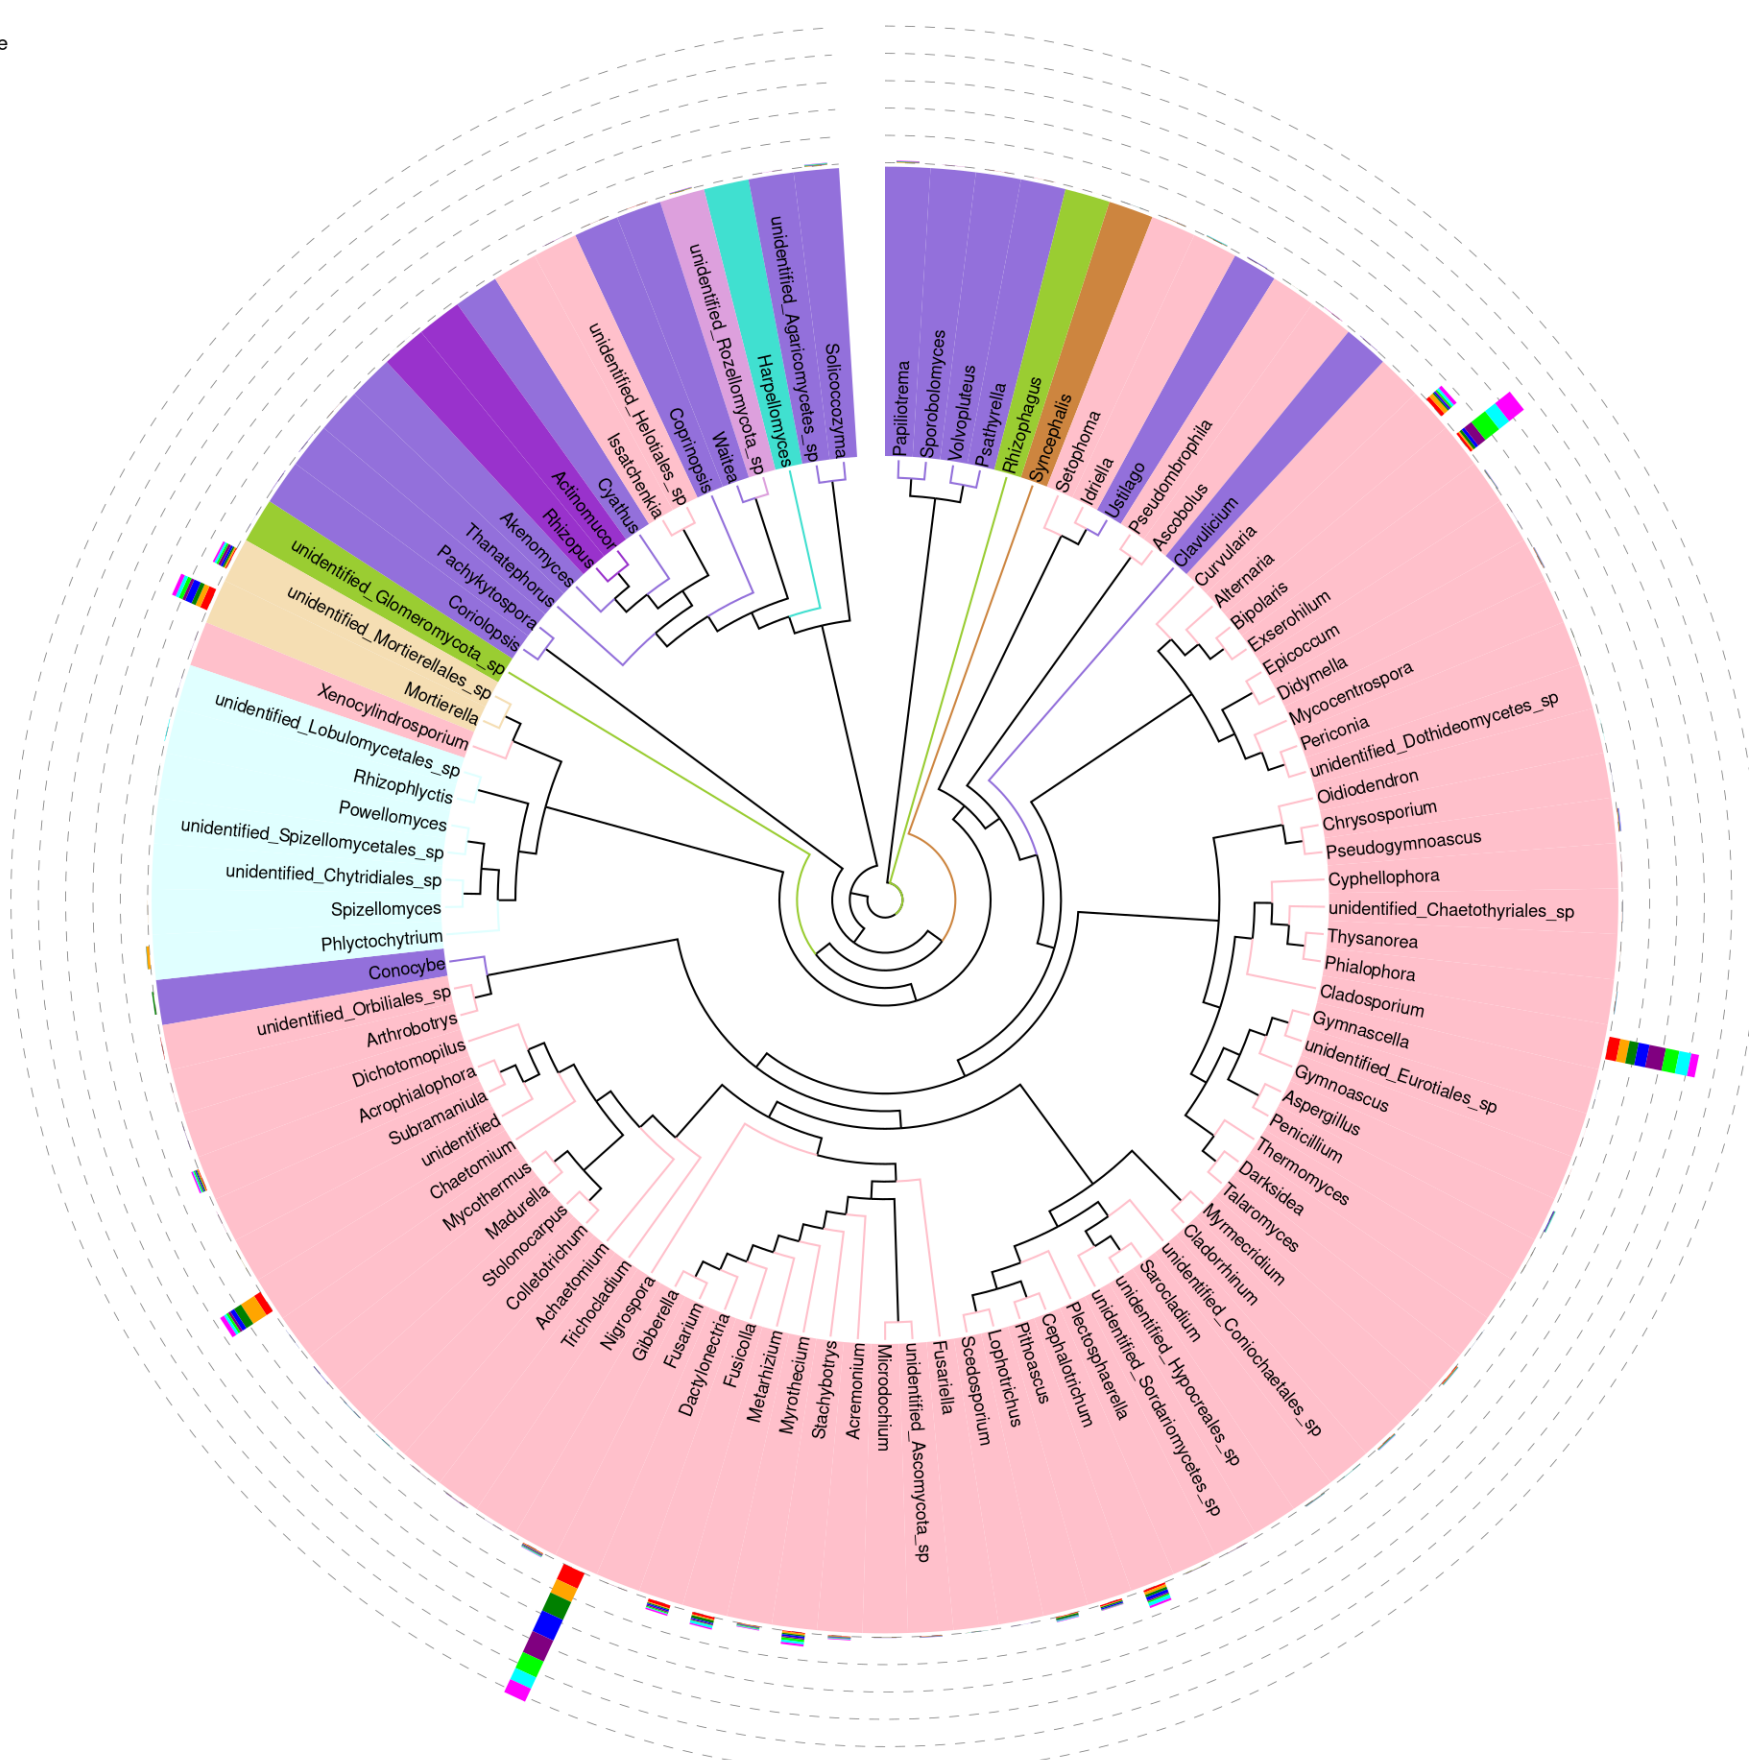

Supplement: s1 [file s1]
