# Supplementary material for: Effects of Insect-Resistant Maize HGK60 on Community Diversity of Bacteria and Fungi in Rhizosphere Soil
Source: MDPI journal article supplement (doi:10.3390/plants11212824), 2022-10-24

Abundance

- HS.A  
■ HS.B  
■ MS.A  
■ MS.B  
■ DS.A  
■ DS.B  
■ PH.A  
■ PH.B

Phylum

- Proteobacteria
- Acidobacteriota
- Bacteroidota
- Firmicutes
- Fusobacteriota
- Verrucomicrobiota
- Actinobacteriota
- Campylobacterota
- Spirochaetota
- Cyanobacteria
- Myxococcota
- Crenarchaeota
- Chloroflexi

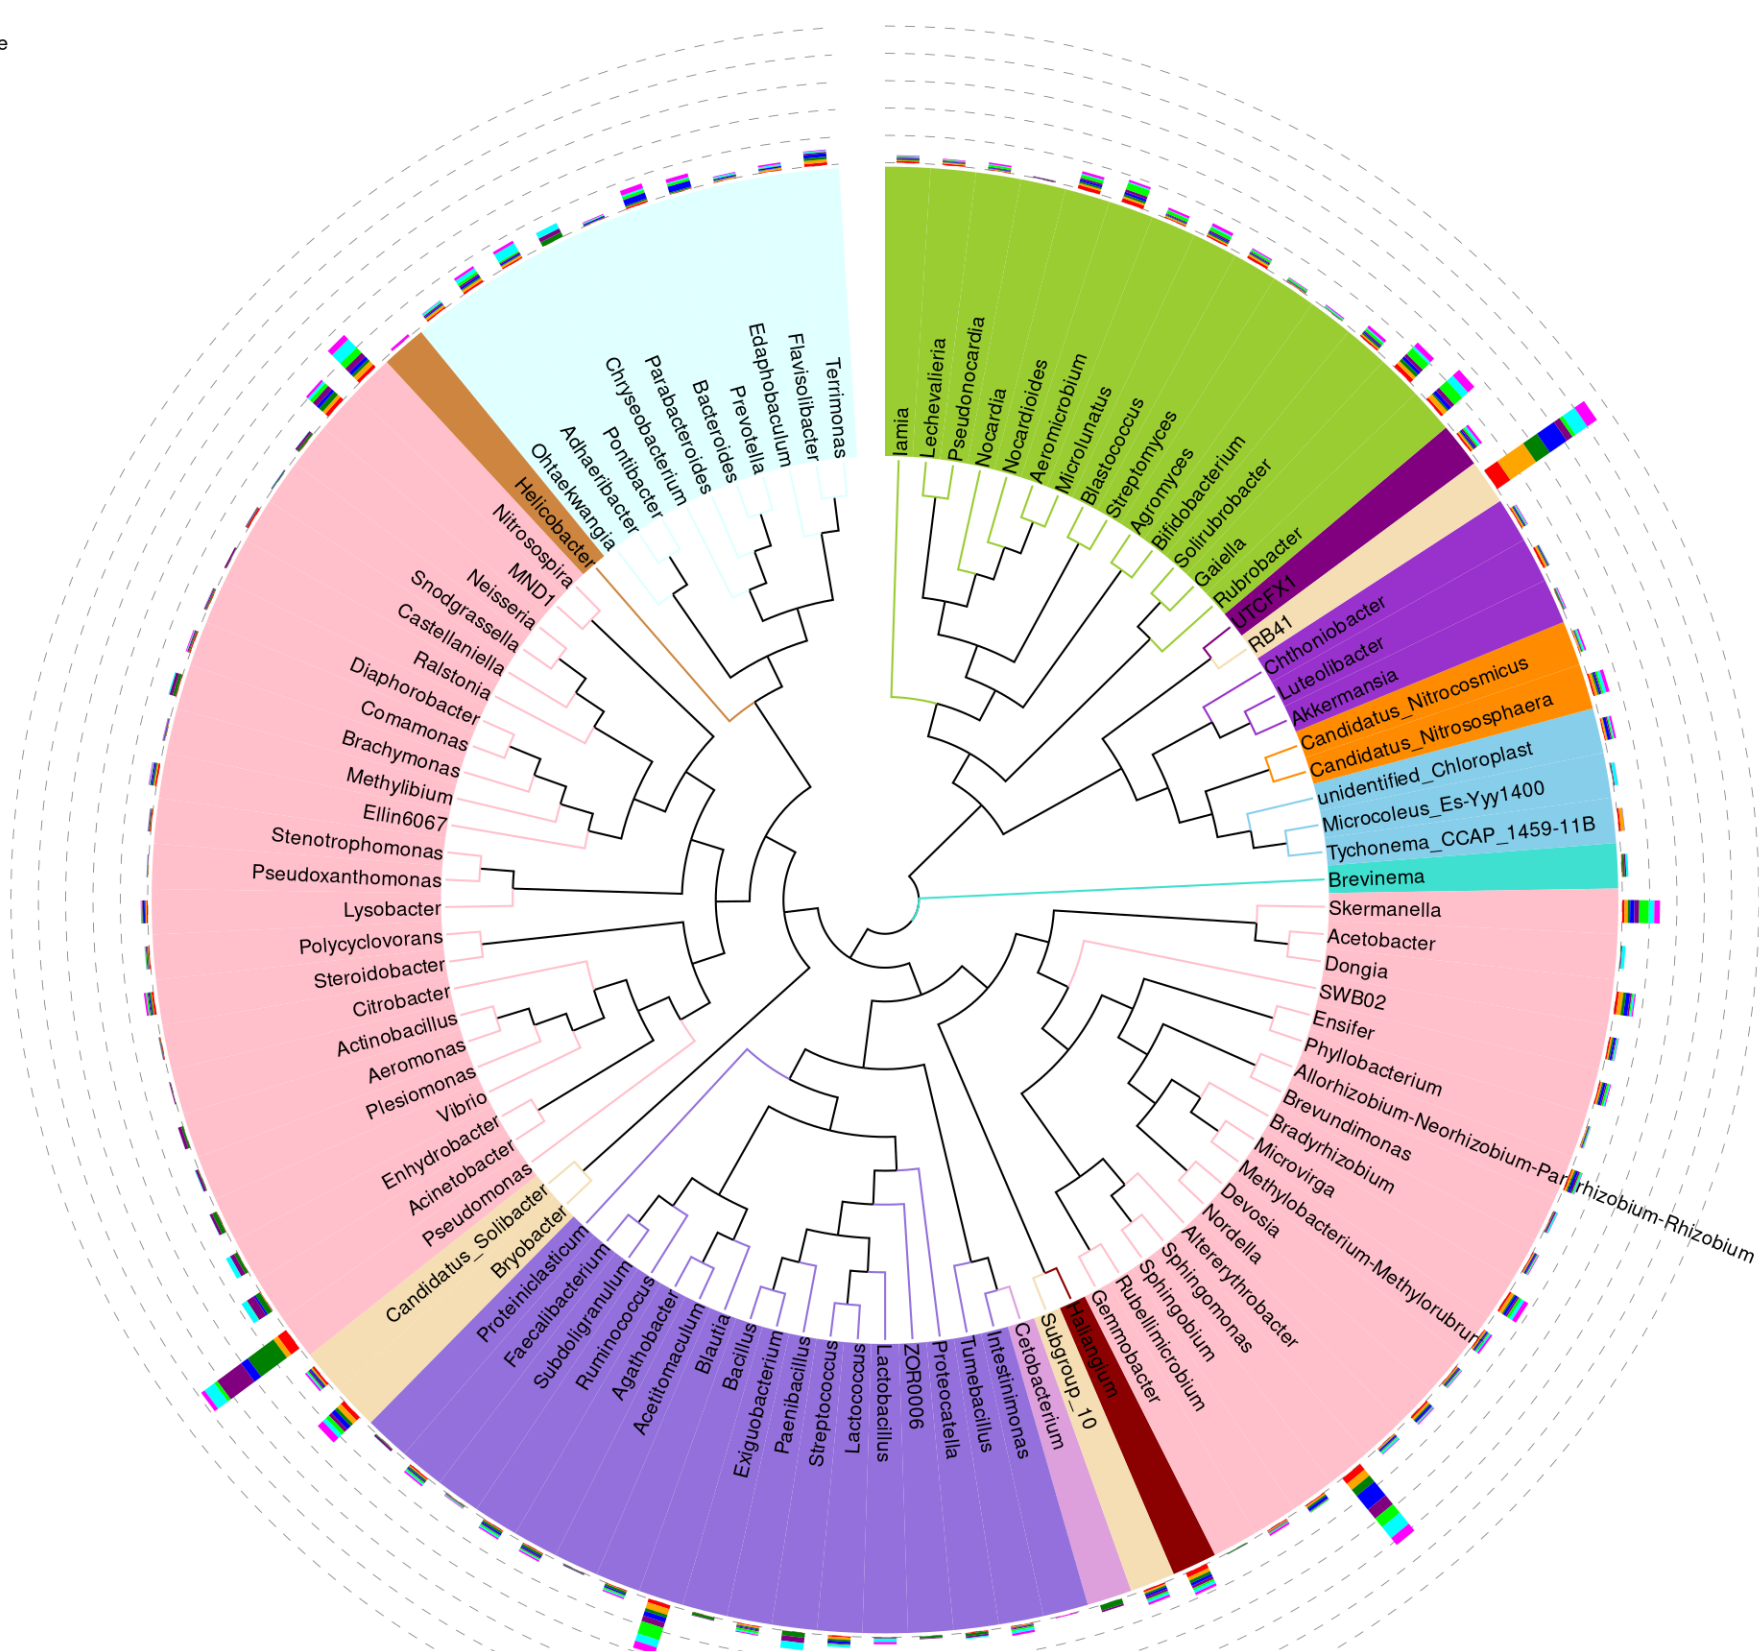

Supplement: s1 [file s1]
