# Supplementary figures and images for: Effects of Insect-Resistant Maize HGK60 on Community Diversity of Bacteria and Fungi in Rhizosphere Soil
Source: MDPI journal article supplement (doi:10.3390/plants11212824), 2022-10-24

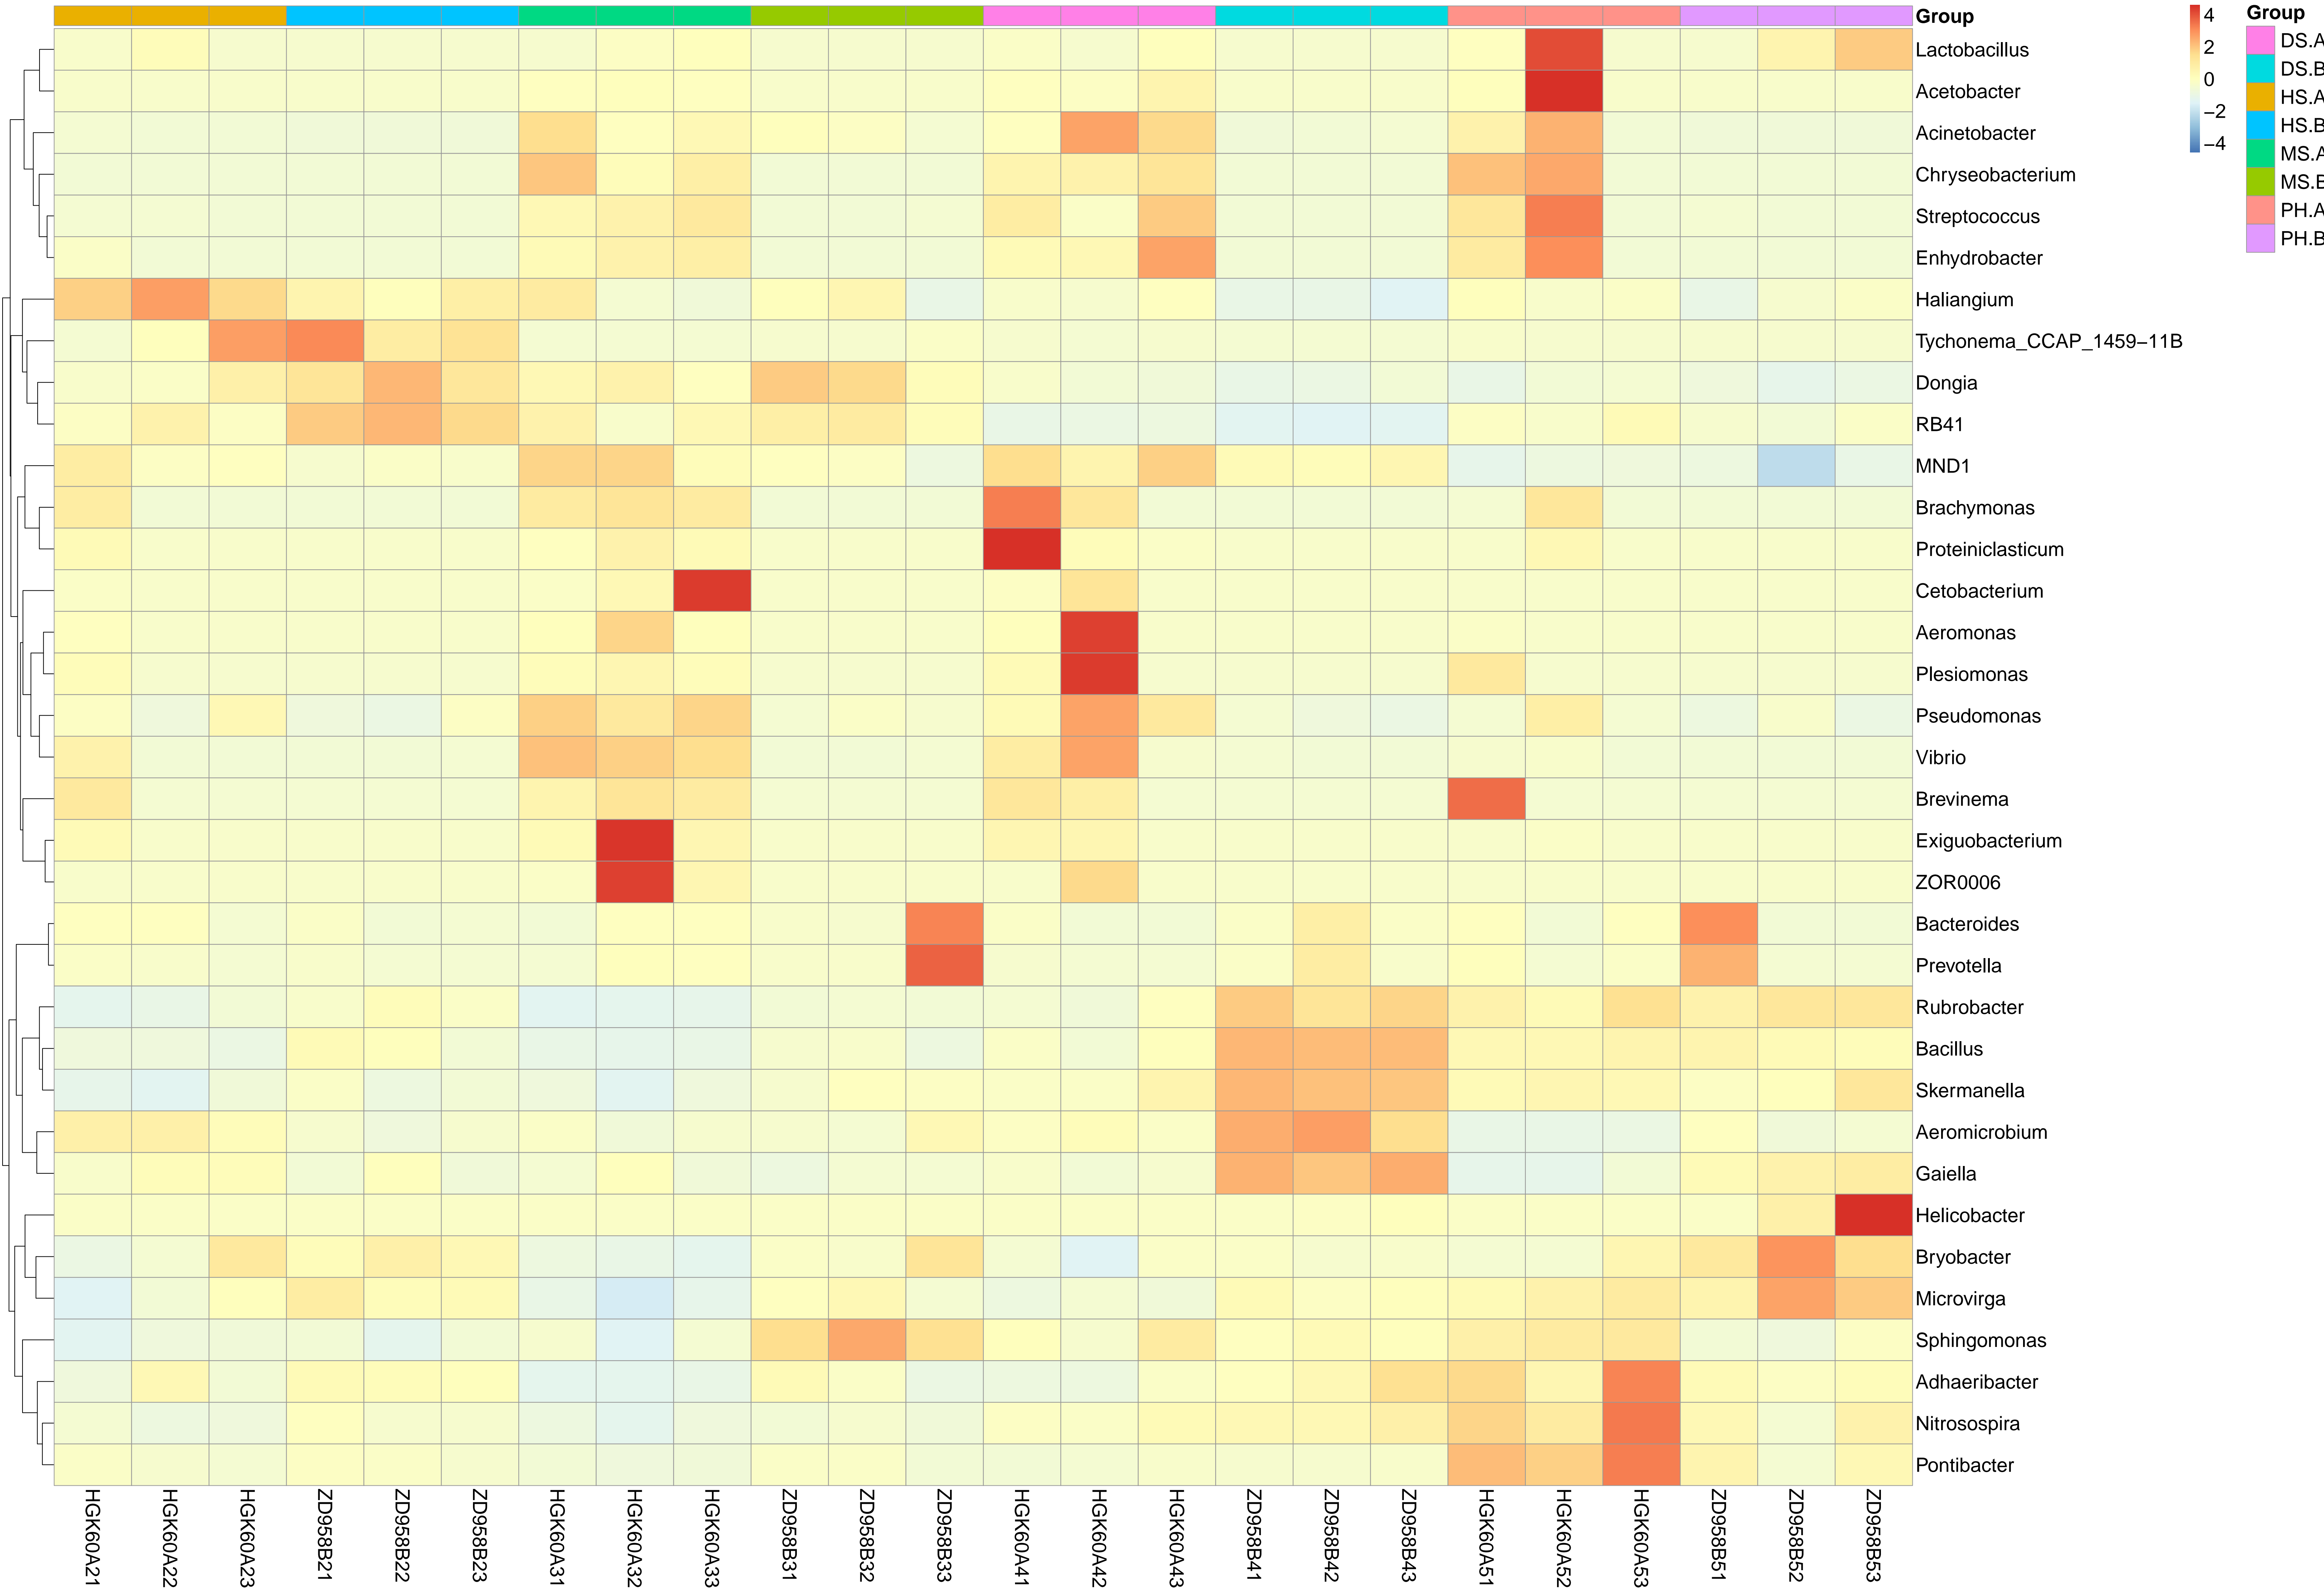

Supplement: s1 [file s1]

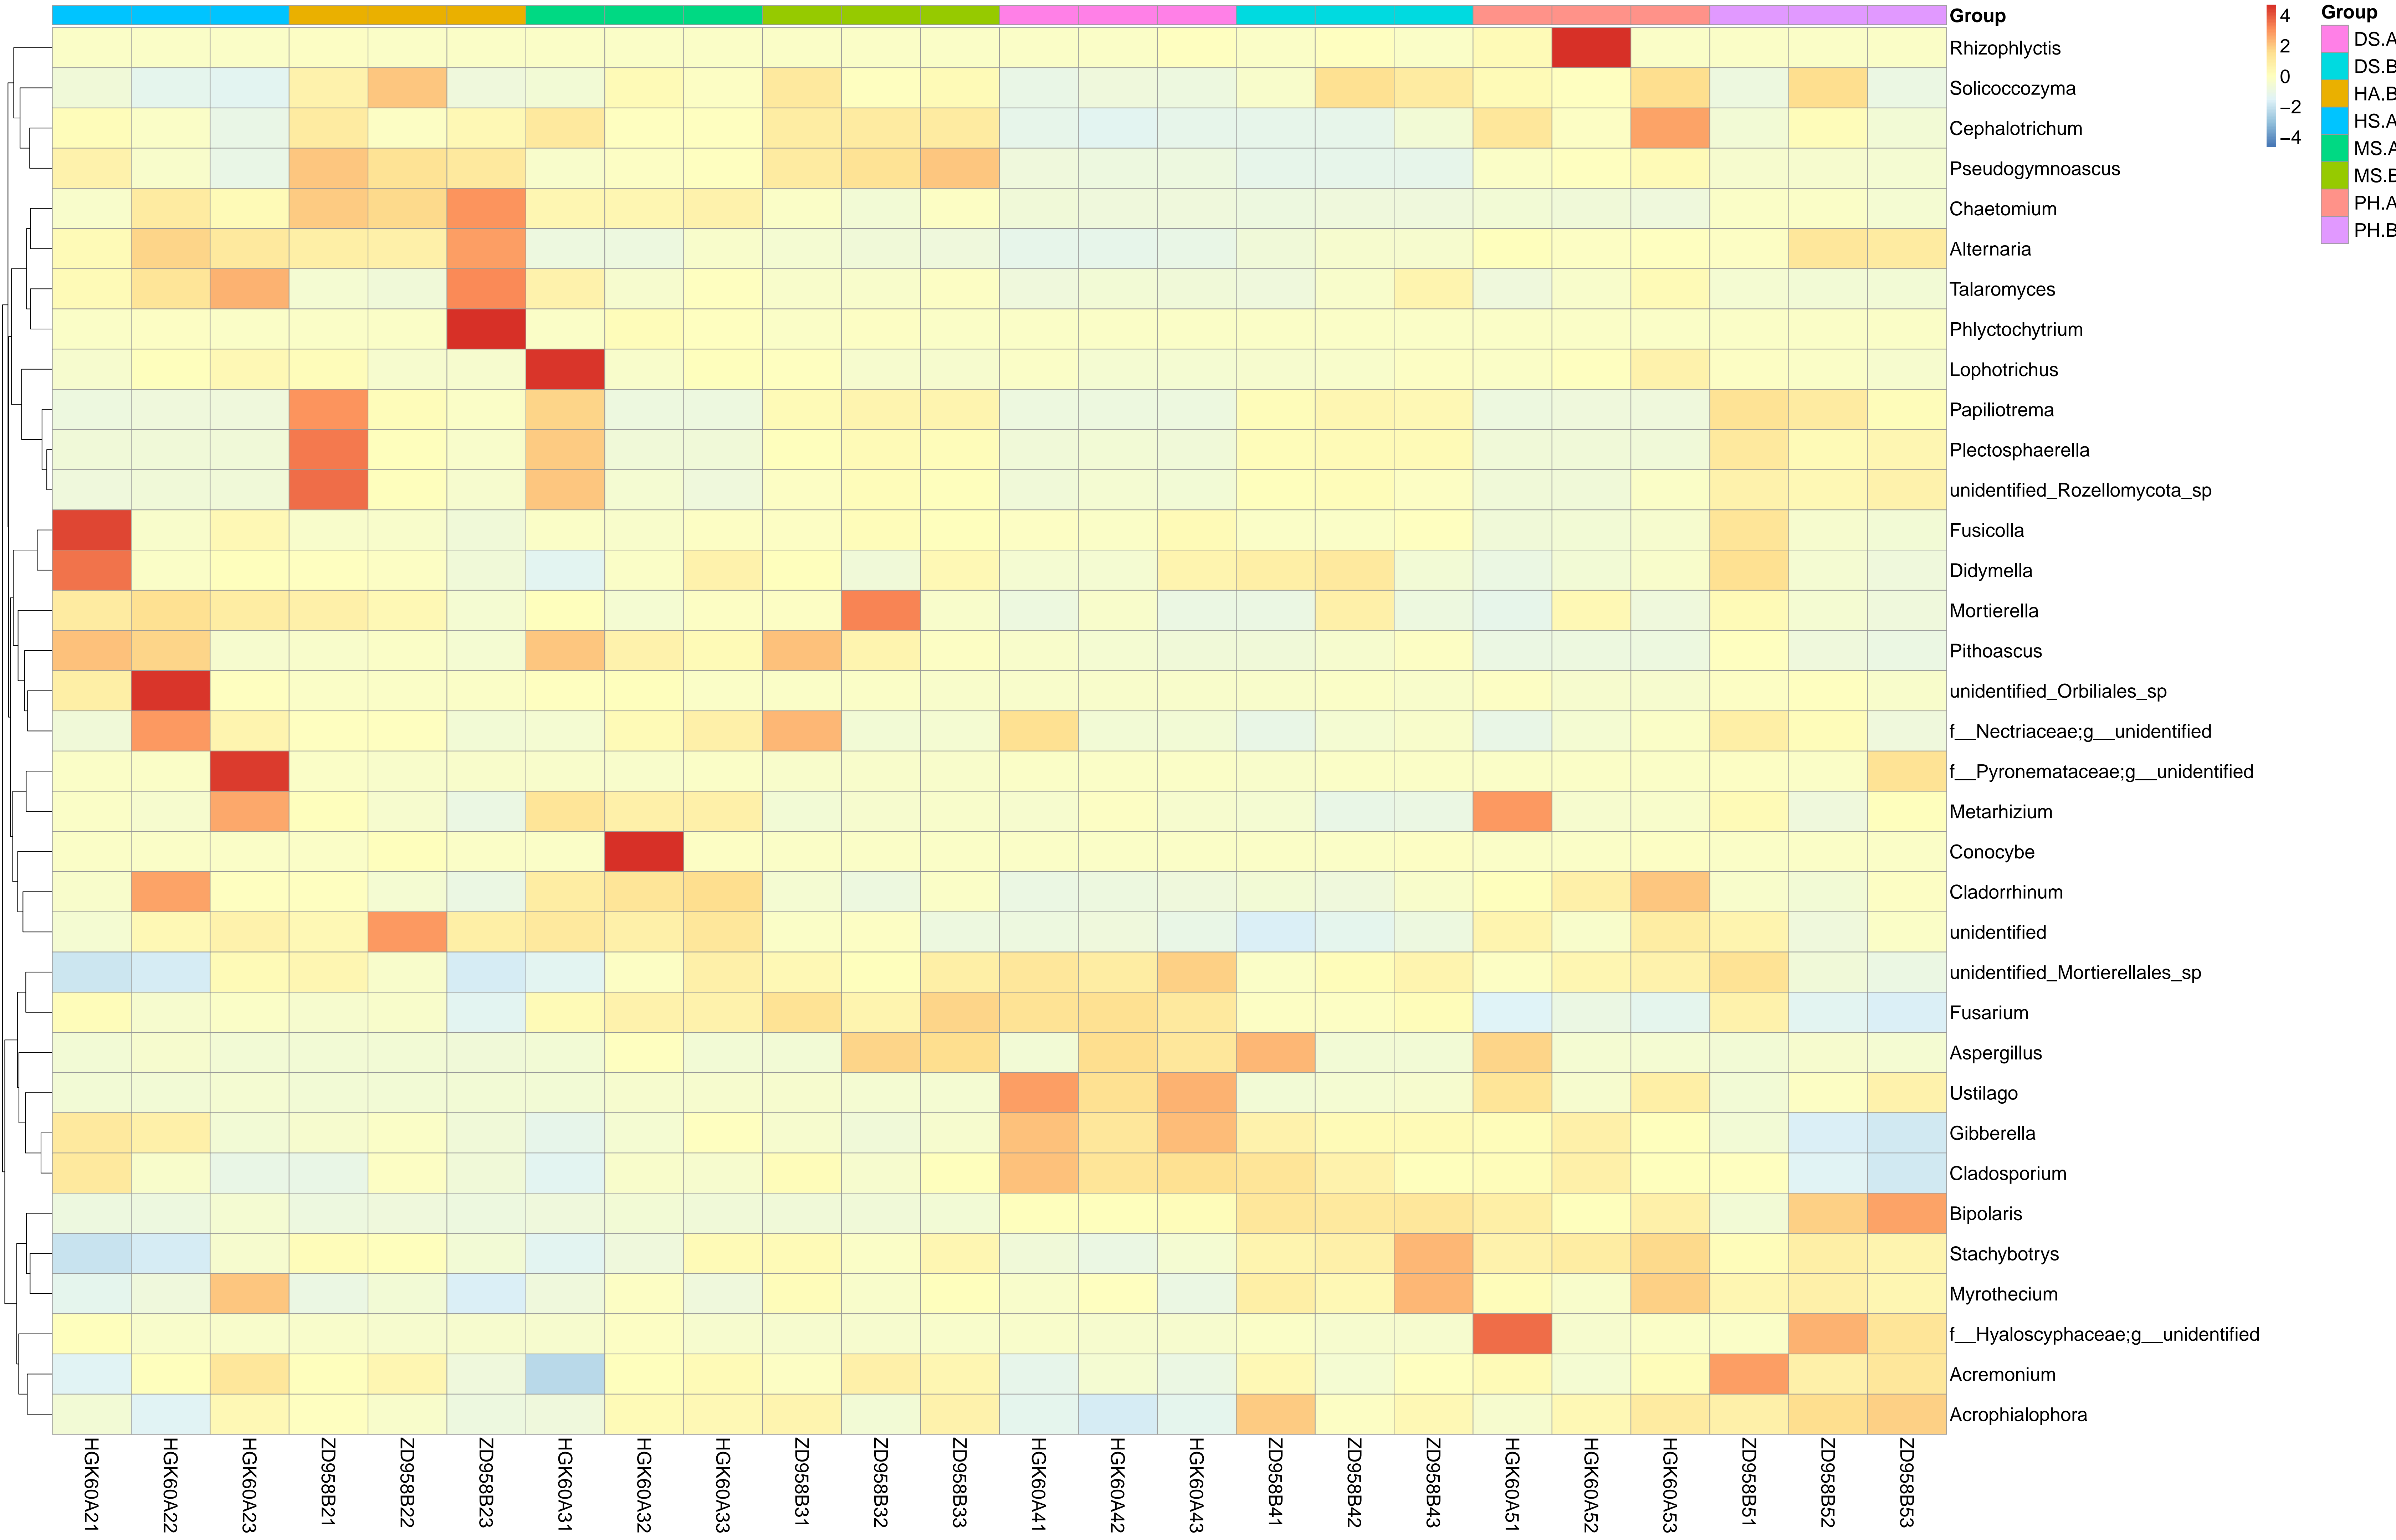

Supplement: s1 [file s1]
